# Supplementary material
Source: PubMed Central journal article supplement (PMC4854366)
Supplement: jgv-97-922-s001.pdf [file jgv-97-922-s001.pdf]

**Table S1.** PCV2 isolates in southern China used in the present study.

| Isolates               | Age (wk) | Isolate tissue                             | Genome size (nt) | Origin (Province in China) | Year of isolation |
|------------------------|----------|--------------------------------------------|------------------|----------------------------|-------------------|
| JXPX-1-1               | 12       | spleen, lymphoid node, lung, kidney, liver | 1768             | Jiangxi                    | 2013              |
| CS-1-1                 | 9        | spleen, lymphoid node, lung, kidney, liver | 1767             | Hunan                      | 2013              |
| CS-1-2                 | 8        | spleen, lymphoid node, lung, kidney, liver | 1767             | Hunan                      | 2013              |
| CS-1-4                 | 10       | spleen, lymphoid node, lung, kidney, liver | 1767             | Hunan                      | 2013              |
| CS-1-5                 | 3        | spleen, lymphoid node, lung, kidney, liver | 1767             | Hunan                      | 2013              |
| CS-3-1                 | 7        | spleen, lymphoid node, lung, liver         | 1767             | Hunan                      | 2013              |
| CS-3-2                 | 8        | spleen, lymphoid node, lung, liver         | 1767             | Hunan                      | 2013              |
| XT-1-1-1 <sup>★</sup>  | 16       | spleen, lymphoid node, lung                | 1767             | Hunan                      | 2013              |
| XT-1-1-2 <sup>★</sup>  |          |                                            | 1767             |                            |                   |
| YueY-2-2               | 5        | spleen, lymphoid node, lung                | 1767             | Hunan                      | 2013              |
| YueY-3-1               | 13       | spleen, lymphoid node, lung                | 1767             | Hunan                      | 2013              |
| SY-6-2                 | 11       | spleen, lymphoid node, lung, heart         | 1767             | Hunan                      | 2013              |
| SY-6-3                 | 12       | spleen, lymphoid node, lung, heart         | 1767             | Hunan                      | 2013              |
| YiY-1-1                | 6        | spleen, lymphoid node, lung                | 1767             | Hunan                      | 2014              |
| YiY-1-2                | 8        | spleen, lymphoid node, lung                | 1767             | Hunan                      | 2014              |
| YiY-1-3-1 <sup>★</sup> | 5        | spleen, lymphoid node, lung                | 1767             | Hunan                      | 2014              |
| YiY-1-3-2 <sup>★</sup> |          |                                            | 1767             |                            |                   |
| YiY-1-4                | 7        | spleen, lymphoid node, lung                | 1767             | Hunan                      | 2014              |
| YiY-1-5                | 9        | spleen, lymphoid node, lung                | 1767             | Hunan                      | 2014              |
| YiY-2-2                | 16       | spleen, lymphoid node, lung                | 1767             | Hunan                      | 2014              |
| YiY-2-4                | 16       | spleen, lymphoid node, lung                | 1767             | Hunan                      | 2014              |
| YiY-2-6-1 <sup>★</sup> | 16       | spleen, lymphoid node, lung                | 1767             | Hunan                      | 2014              |
| YiY-2-6-2 <sup>★</sup> |          |                                            | 1767             |                            |                   |

|             |    |                             |      |         |      |
|-------------|----|-----------------------------|------|---------|------|
| YiY-2-7-1*  | 13 | spleen, lymphoid node, lung | 1767 | Jiangsu | 2014 |
| YiY-2-7-2*  |    |                             | 1767 |         |      |
| YiY-2-8-1*  | 5  | spleen, lymphoid node, lung | 1767 | Hunan   | 2014 |
| YiY-2-8-2*  |    |                             | 1767 |         |      |
| YiY-2-9-1*  | 12 | spleen, lymphoid node, lung | 1767 | Jiangsu | 2014 |
| YiY-2-9-2*  |    |                             | 1767 |         |      |
| YiY-2-11    | 5  | spleen, lymphoid node, lung | 1767 | Jiangsu | 2014 |
| YiY-2-12    | 12 | spleen, lymphoid node, lung | 1768 | Hubei   | 2014 |
| YiY-2-13-1* | 12 | spleen, lymphoid node, lung | 1767 | Hunan   | 2014 |
| YiY-2-13-2* |    |                             | 1767 |         |      |
| YiY-3-2-1*  | 8  | spleen, lymphoid node, lung | 1767 | Hubei   | 2015 |
| YiY-3-2-2*  |    |                             | 1767 |         |      |
| YiY-3-3     | 16 | spleen, lymphoid node, lung | 1767 | Hunan   | 2015 |
| YiY-3-10    | 12 | spleen, lymphoid node, lung | 1767 | Hunan   | 2015 |
| YiY-3-12    | 16 | spleen, lymphoid node, lung | 1767 | Hunan   | 2015 |
| YiY-3-13-1* | 12 | spleen, lymphoid node, lung | 1767 | Hunan   | 2015 |
| YiY-3-13-2* |    |                             | 1767 |         |      |
| YiY-3-14    | 12 | spleen, lymphoid node, lung | 1767 | Hunan   | 2015 |
| YiY-3-20    | 8  | spleen, lymphoid node, lung | 1767 | Hubei   | 2015 |
| YiY-3-23    | 16 | spleen, lymphoid node, lung | 1767 | Hunan   | 2015 |
| YiY-3-24    | 16 | spleen, lymphoid node, lung | 1767 | Hunan   | 2015 |
| YiY-3-27    | 8  | spleen, lymphoid node, lung | 1767 | Hubei   | 2015 |
| YiY-3-28-1* | 12 | spleen, lymphoid node, lung | 1767 | Hunan   | 2015 |
| YiY-3-28-2* |    |                             | 1767 |         |      |
| YiY-3-29-1* | 16 | spleen, lymphoid node, lung | 1767 | Hunan   | 2015 |
| YiY-3-29-2* |    |                             | 1767 |         |      |

|             |    |                             |      |         |      |
|-------------|----|-----------------------------|------|---------|------|
| YiY-3-30    | 12 | spleen, lymphoid node, lung | 1767 | Hunan   | 2015 |
| YiY-3-31-1* |    |                             | 1767 |         |      |
| YiY-3-31-2* | 16 | spleen, lymphoid node, lung | 1767 | Hunan   | 2015 |
| YiY-3-33    | 16 | spleen, lymphoid node, lung | 1767 | Jiangsu | 2015 |
| YiY-3-34-1* |    |                             | 1767 |         |      |
| YiY-3-34-2* | 5  | spleen, lymphoid node, lung | 1767 | Jiangsu | 2015 |
| YiY-3-36-1* |    |                             | 1767 |         |      |
| YiY-3-36-2* | 5  | spleen, lymphoid node, lung | 1767 | Jiangsu | 2015 |
| YiY-3-39    | 12 | spleen, lymphoid node, lung | 1767 | Hunan   | 2015 |
| YiY-3-40    | 8  | spleen, lymphoid node, lung | 1767 | Hunan   | 2015 |
| YiY-3-45    | 8  | spleen, lymphoid node, lung | 1767 | Hunan   | 2015 |
| YiY-3-46-1* |    |                             | 1767 |         |      |
| YiY-3-46-2* | 16 | spleen, lymphoid node, lung | 1767 | Hunan   | 2015 |

The 2 PCV2 isolates obtained from the same pig (15 groups) were indicated with a star (\*).

**Table S2.** Oligonucleotide primers used in this study.

| Primer name                | Sequence (5'-3')                                     | Primer size (bp) | Product length (bp) | Position  | Refer GenBank no. |
|----------------------------|------------------------------------------------------|------------------|---------------------|-----------|-------------------|
| pPCV2-cap-F-ZY009          | CCA TAT GAA ATA AAT TAC TGA G                        | 22               | 702                 | 1734-1715 | AY484416          |
| pPCV2-cap-R-ZY010          | CAG CGC ACT TCT TTC GTT TTC AG                       | 23               |                     | 1033-1059 |                   |
| pPCV2-FL-F-Kpn I-ZY001     | CGG <i>GGTACC</i> ACT GAG TCT TTT TTA TCA CTT CG     | 32               | 1777 or 1778        | 991-1013  | AY321991          |
| pPCV2-FL-R-Hind III -ZY002 | CCC <i>AAGCTT</i> AAG ACT CAG TAA TTT ATT TCA TAT GG | 35               |                     | 1000-975  |                   |
| pPCV2-FL-Seq001            | TGA AGA TGC CAT TTT TCC                              | 18               | /                   | 1599-1616 |                   |
| pPSP72-BSP6-Seq002         | TCG TTA GAA CGC GGC TAC                              | 18               | /                   | 2393-2410 | X65332            |

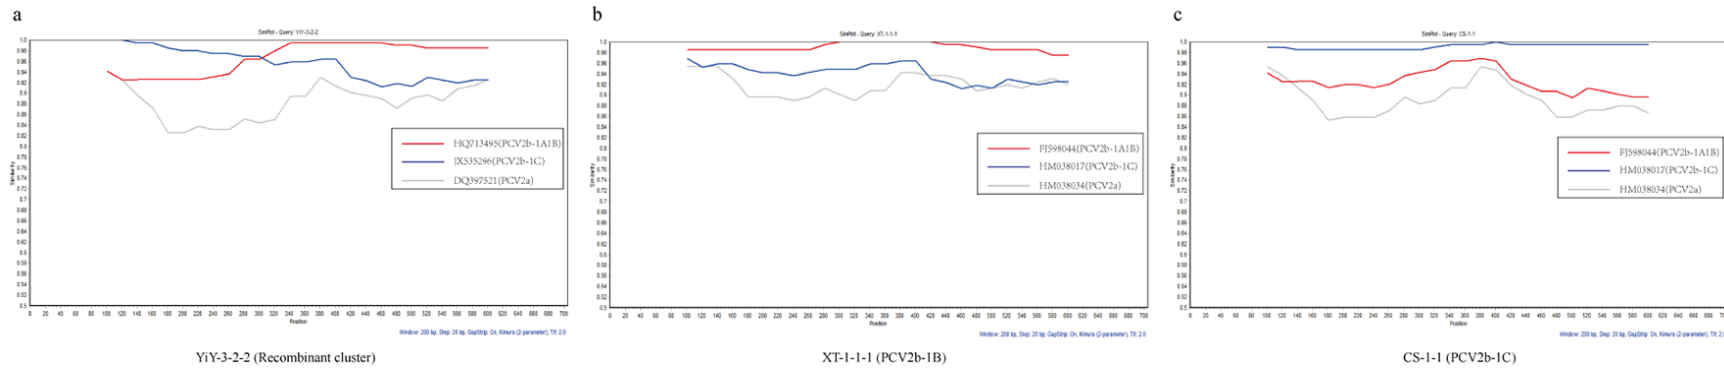

**Fig. S1** Analyses of PCV2 genome recombination

a) The *cap* gene of the new cluster (YiY-3-2-2) used as a query sequence along with three distinct strains of PCV2b-1A/1B (HQ713495), PCV2b-1C (JX535296) and PCV2a (DQ397521), recovered from USA as reference sequences were used for the recombination analysis.

b and c) The *cap* genes of XT-1-1-1 (PCV2b-1A/1B) and CS-1-1 (PCV2b-1C), recovered in our study and used as control query sequences along with reference sequences of PCV2b-1A/1B (FJ598044), PCV2b-1C (HM038017) and PCV2a (HM038034) for the two recombination analyses.

A molecular recombination software (SimPlot) was employed for the analyses. The y-axis indicates percentage of identity within a sliding window (200 bp wide) centered on the position plotted, with a step size between plots of 20 bp.

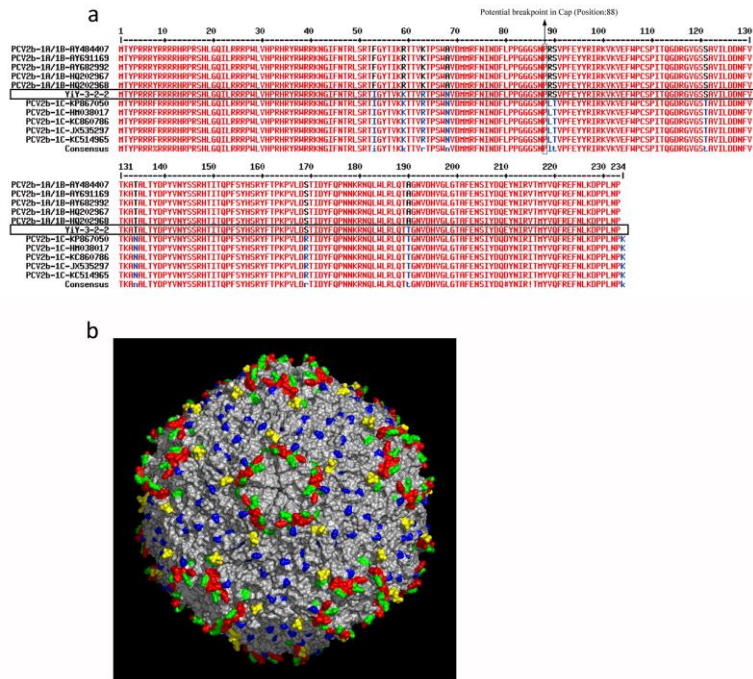

**Fig. S2** The capsid of the new cluster (YiY-3-2-2) has a surface combination from PCV2b-1A/1B before the breakpoint and PCV2b-1C after the breakpoint.

All the variable Cap amino acid residues in the alignment (a) were distributed on the capsid surface (green and blue in b). Before the breakpoint, the distinct amino acid residues (green in b) were located around Loops BC-decorated 5-fold axes (red in b) of the capsid. After the breakpoint, variable amino acid residues were labeled in blue (b) on the capsid surface. The two amino acid residues (<sup>230</sup>PL<sup>231</sup>) of Loop CT were displayed in

yellow on the surface (b).

Note: the last two amino acid (<sup>232</sup>NP<sup>233</sup>) of Loop CT in the cluster of traditional PCV2b were missed in the capsid structure model. In addition, the extra lysine (<sup>244</sup>K) of Loop CT in the cluster of the mutated PCV2b (PCV2b/1C) was also absent.
